# Supplementary material for: Deep Learning as Ricci Flow
Source: Research Square preprint supplement (doi:10.21203/rs.3.rs-4307646/v1), 2024-05-15
Supplement: Supplementary file 1 [file 882af3ec630d93ab8b2435b4.xlsx]

## Sheet: Sheet1
Test set accuracy ~ coefficients		Estimate	Std. Error	t value	p value
	Adjusted Ricci Coef	-0.00039	0.000174	-2.27013	0.023374
Dataset compared to MNIST 1 vs 7	MNIST 6 vs 8	0.002011	0.000346	5.80711	8.11e-09
	A	0.00532	0.000368	14.4472	8.84e-44
	B	0.00195	0.000402	4.85426	1.37e-06
	C	-0.07221	0.00039	-185.207	0
	fMNIST sandals vs ankle boots	-0.00785	0.000355	-22.1088	2.58e-91
	fMNIST coats vs shirts	-0.07968	0.000369	-215.882	0
DNN width compared to Narrow DNN	Wide	0.000216	0.000246	0.878088	0.38007
	Bottleneck	0.000658	0.000243	2.70625	0.0069
DNN depth	Shallow vs Deep	3.57e-05	0.000233	0.153348	0.878149
